# Supplementary material for: Differential Effect of Newly Isolated Phages Belonging to PB1-Like, phiKZ-Like and LUZ24-Like Viruses against Multi-Drug Resistant Pseudomonas aeruginosa under Varying Growth Conditions
Source: MDPI journal article supplement (doi:10.3390/v9110315), 2017-10-27
Supplement: s1 [file s1]

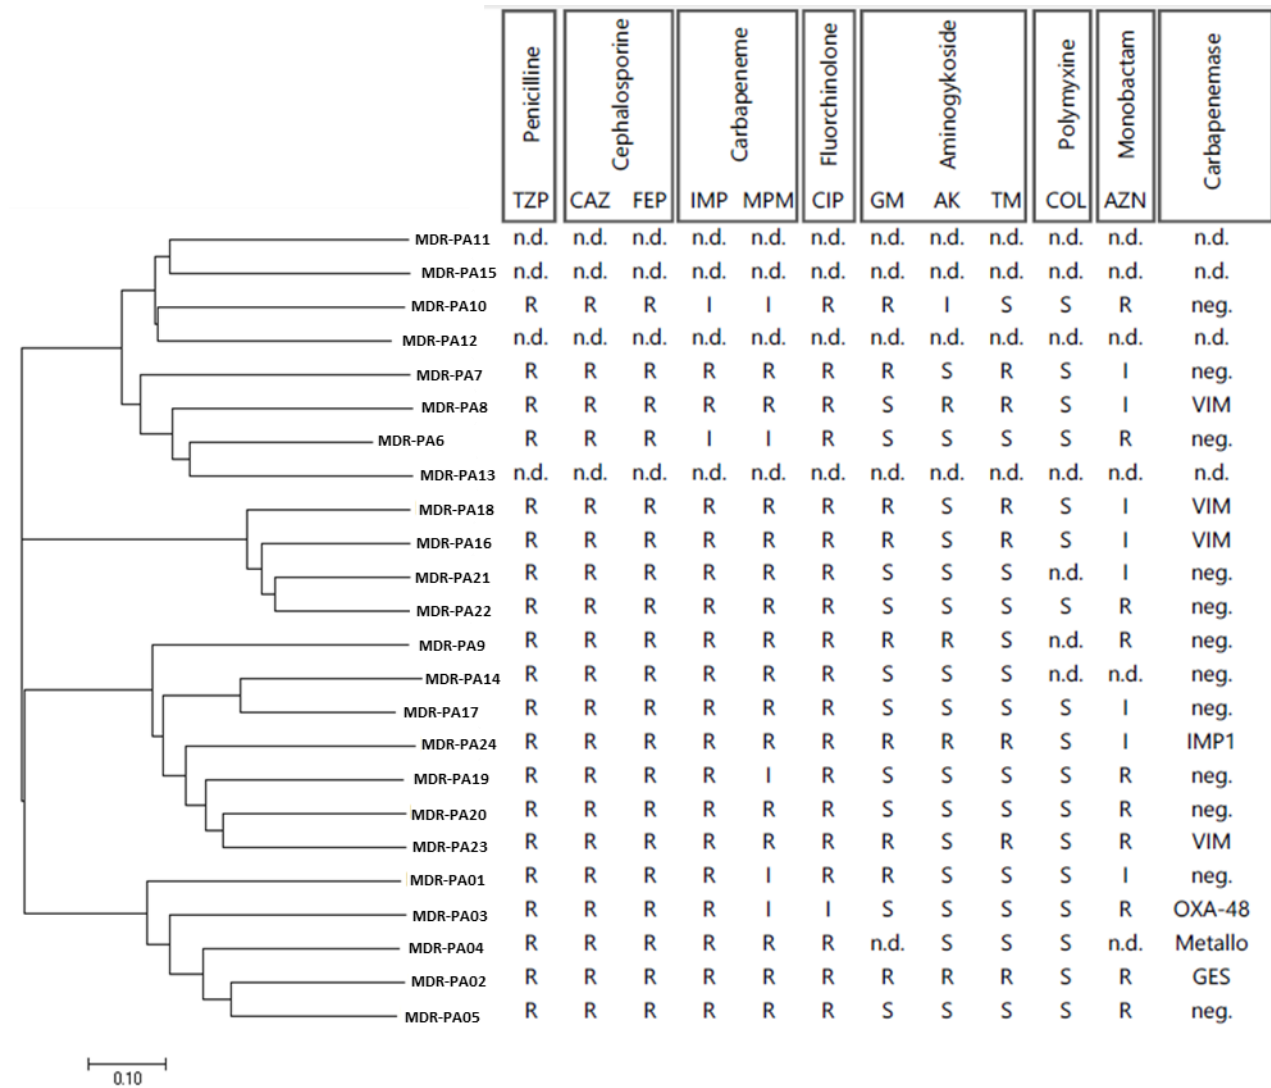

Fig. S1 Neighbor-joining dendrogram of ERIC-PCR results for multi-drug resistant *P. aeruginosa* isolates (MDR-PA1-24) and resistance profiles. Piperacillin/Tazobactam (TZP), Ceftazidim (CAZ), Cefepim (FEP), Imipenem (IMP), Meropenem (MPM), Ciprofloxacin (CIP), Gentamicin (GM), Amikacin (AK), Tobramycin (TM), Colistin (COL) and Aztreonam (AZN). R= resistant, I= intermediate, S= sensitive, n.d.: not determined; neg = no known carbapenemases were detected via PCR;



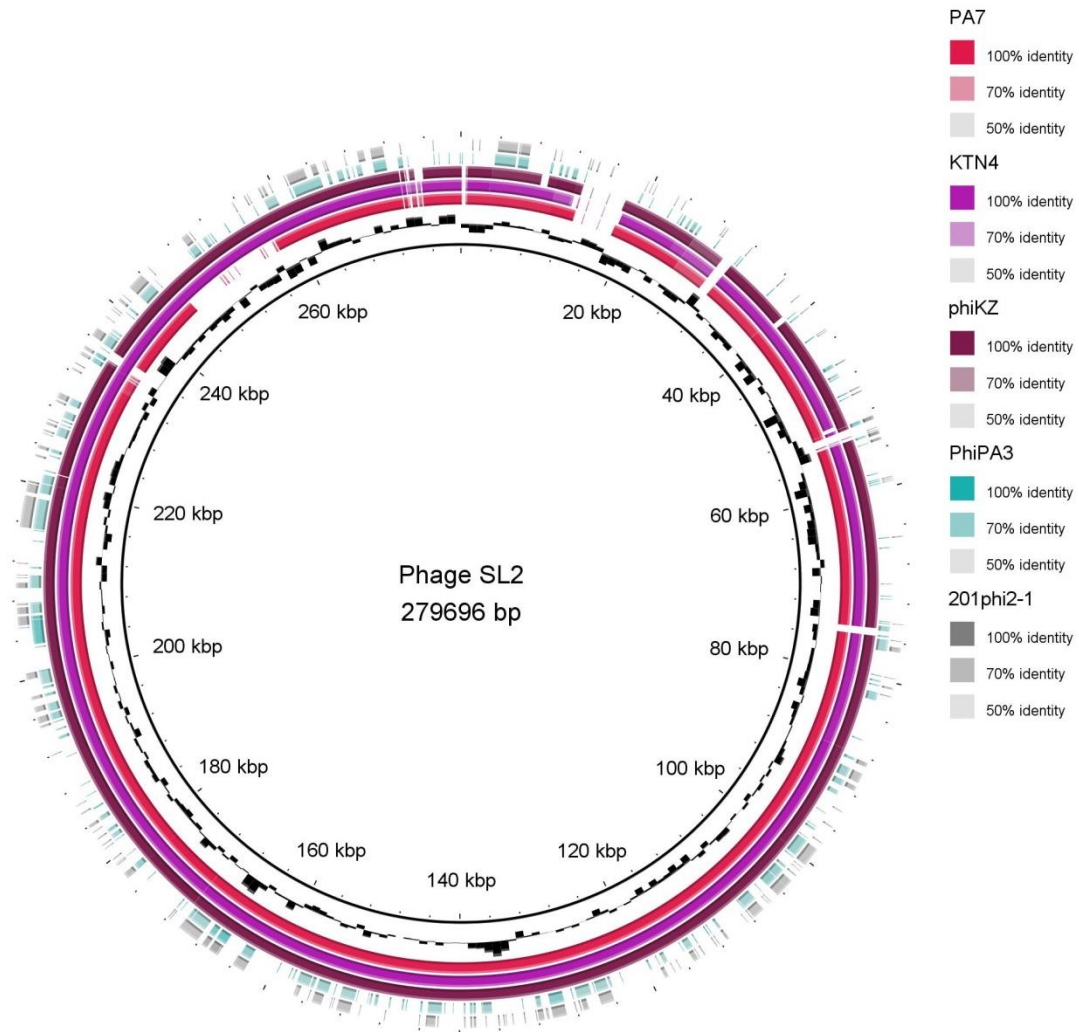

Fig. S3 Visualisation of the BLASTn results. Comparison of phage SL2 with five members of the phiKZ-like viruses

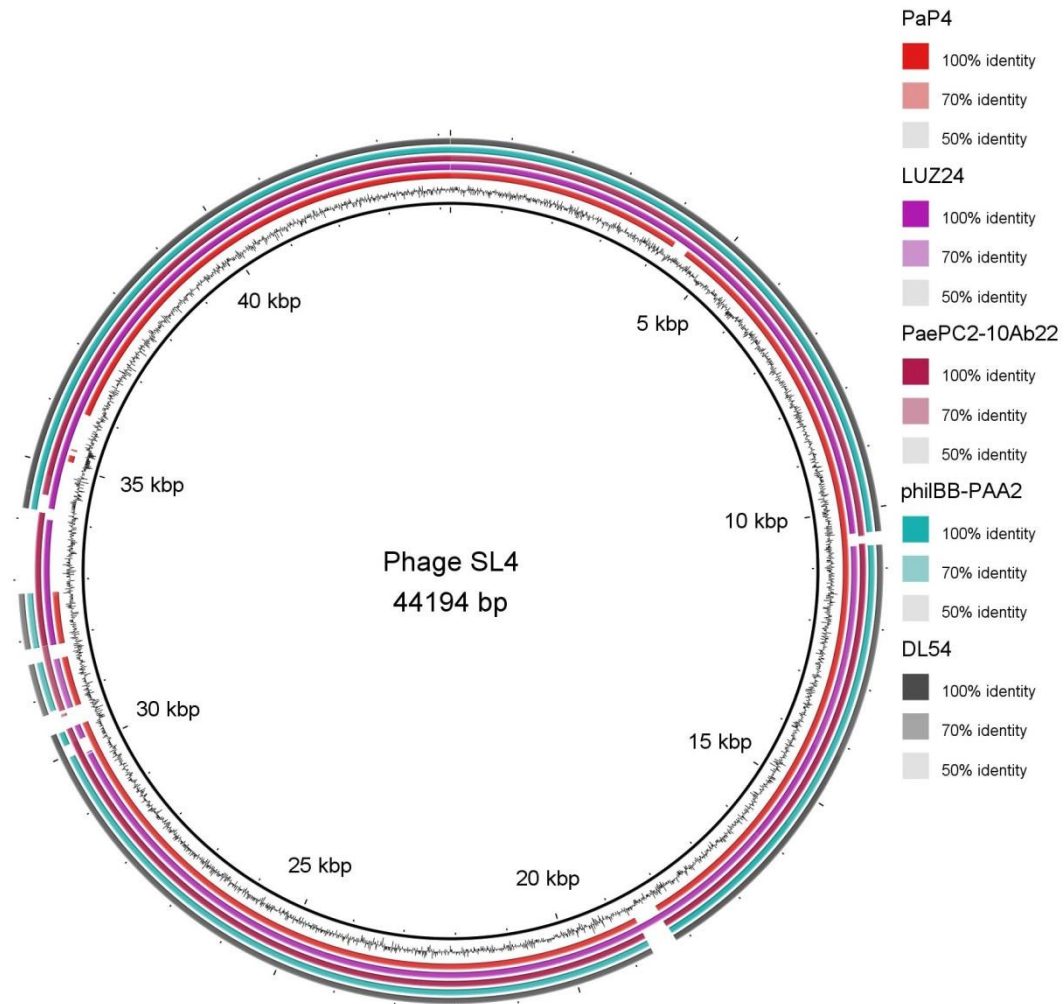

Fig. S4 Visualisation of the BLASTn results. Comparison of phage SL4 with five members of the LUZ24-like viruses
